# Supplementary material
Source: bioRxiv or medRxiv preprint supplement (https://medrxiv.org/highwire/filestream/80956/field_highwire_adjunct_files/0/2020.05.11.20093096-1.pdf)
Supplement: Supplementary file [file 2020.05.11.20093096-1.pdf]

# Supplemental data

| Variable                                                                                                                                 | Comparison of patients with available data |                            |          |                                        | Coverage of available data – no. (%) |                           |
|------------------------------------------------------------------------------------------------------------------------------------------|--------------------------------------------|----------------------------|----------|----------------------------------------|--------------------------------------|---------------------------|
|                                                                                                                                          | COVID-19 positive (n=1148)                 | COVID-19 negative (n=1608) | P-value* | Standardised mean difference (95% CI)† | COVID19 Positive (n=1148)            | COVID19 Negative (n=1608) |
| <b>Demographics</b>                                                                                                                      |                                            |                            |          |                                        |                                      |                           |
| Age - yr                                                                                                                                 | 61.22±20.06                                | 51.44±21.94                | <0.001   | -                                      | 1148 (100.0)                         | 1608 (100.0)              |
| Sex - no. (%)                                                                                                                            |                                            |                            | <0.001   |                                        |                                      |                           |
| Male                                                                                                                                     | 698 (60.8)                                 | 737 (45.8)                 |          |                                        | 1147 (99.9)                          | 1608 (100.0)              |
| Female                                                                                                                                   | 449 (39.1)                                 | 871 (54.2)                 |          |                                        | 1147 (99.9)                          | 1608 (100.0)              |
| <b>Ethnicity - no. (%)‡</b>                                                                                                              |                                            |                            |          |                                        |                                      |                           |
| Asian                                                                                                                                    | 412 (35.9)                                 | 620 (38.6)                 | 0.001    | -                                      | 412 (35.9)                           | 620 (38.6)                |
| Black                                                                                                                                    | 162 (14.1)                                 | 182 (11.3)                 |          | -                                      | 162 (14.1)                           | 182 (11.3)                |
| White                                                                                                                                    | 70 (6.1)                                   | 58 (3.6)                   |          | -                                      | 70 (6.1)                             | 58 (3.6)                  |
| Other/Unspecified                                                                                                                        | 504 (43.9)                                 | 748 (46.5)                 |          | -                                      | 504 (43.9)                           | 748 (46.5)                |
| <b>Most common primary and secondary ICD-10 diagnoses from historical data - no. (%) of patients with a record of previous diagnoses</b> |                                            |                            |          |                                        |                                      |                           |
| I10 - Essential (primary) hypertension                                                                                                   | 276 (50.4)                                 | 257 (44.1)                 | 0.040    | -                                      | 276 (24.0)                           | 257 (16.0)                |
| E78.0 - Pure hypercholesterolemia                                                                                                        | 175 (31.9)                                 | 157 (26.9)                 | 0.075    | -                                      | 175 (15.2)                           | 157 (9.8)                 |
| E11.9 - Type 2 diabetes mellitus without complications                                                                                   | 155 (28.3)                                 | 129 (22.1)                 | 0.021    | -                                      | 155 (13.5)                           | 129 (8.0)                 |
| U07.1 - Infection due to SARS-coV-2                                                                                                      | 264 (48.2)                                 | 4 (0.7)                    | <0.001   | -                                      | 264 (23.0)                           | 4 (0.2)                   |
| Z86.4 - Personal history of psychoactive substance abuse (tobacco, alcohol, or drugs)                                                    | 134 (24.5)                                 | 131 (22.5)                 | 0.474    | -                                      | 134 (11.7)                           | 131 (8.1)                 |
| N17.9 - Acute kidney failure, unspecified                                                                                                | 135 (24.6)                                 | 122 (20.9)                 | 0.157    | -                                      | 135 (11.8)                           | 122 (7.6)                 |
| Z50.1 - Other physical therapy                                                                                                           | 123 (22.4)                                 | 128 (22.0)                 | 0.899    | -                                      | 123 (10.7)                           | 128 (8.0)                 |
| Z29.0 - Isolation                                                                                                                        | 157 (28.6)                                 | 58 (9.9)                   | <0.001   | -                                      | 157 (13.7)                           | 58 (3.6)                  |
| Z03.8 - Observation for other suspected diseases and conditions                                                                          | 22 (4.0)                                   | 189 (32.4)                 | <0.001   | -                                      | 22 (1.9)                             | 189 (11.8)                |
| B97.2 - Coronavirus as the cause of diseases classified elsewhere                                                                        | 205 (37.4)                                 | 4 (0.7)                    | <0.001   | -                                      | 205 (17.9)                           | 4 (0.2)                   |
| <b>Most commonly prescribed drug types from historical data - no. (%) of patients with at least one previous prescription)§</b>          |                                            |                            |          |                                        |                                      |                           |
| 5.01 - Antibacterial drugs                                                                                                               | 449 (68.9)                                 | 438 (69.9)                 | 0.746    | -                                      | 449 (39.1)                           | 438 (27.2)                |
| 4.07 - Analgesics                                                                                                                        | 243 (37.3)                                 | 259 (41.3)                 | 0.155    | -                                      | 243 (21.2)                           | 259 (16.1)                |
| 1.03 - Antisecretory drugs and mucosal protectants                                                                                       | 205 (31.4)                                 | 216 (34.4)                 | 0.278    | -                                      | 205 (17.9)                           | 216 (13.4)                |
| 1.06 - Laxatives                                                                                                                         | 189 (29.0)                                 | 213 (34.0)                 | 0.063    | -                                      | 189 (16.5)                           | 213 (13.2)                |
| 2.08 - Anticoagulants and protamine                                                                                                      | 206 (31.6)                                 | 196 (31.3)                 | 0.945    | -                                      | 206 (17.9)                           | 196 (12.2)                |

|                                                                       | COVID-19 positive<br>(n=1148) | COVID-19 negative<br>(n=1608) | P-value* | Standardised<br>mean<br>difference<br>(95% CI)† | COVID19<br>Positive<br>(n=1148) | COVID19<br>Negative<br>(n=1608) |
|-----------------------------------------------------------------------|-------------------------------|-------------------------------|----------|-------------------------------------------------|---------------------------------|---------------------------------|
| 2.12 - Lipid regulating drugs                                         | 167 (25.6)                    | 168 (26.8)                    | 0.677    | -                                               | 167 (14.5)                      | 168 (10.4)                      |
| 2.06 - Nitrates, calcium-channel blockers and other antianginal drugs | 152 (23.3)                    | 152 (24.2)                    | 0.745    | -                                               | 152 (13.2)                      | 152 (9.5)                       |
| 2.05 - Hypertension and Heart Failure                                 | 149 (22.9)                    | 150 (23.9)                    | 0.699    | -                                               | 149 (13.0)                      | 150 (9.3)                       |
| 2.04 - Beta-Adrenoceptor Blocking Drugs                               | 129 (19.8)                    | 138 (22.0)                    | 0.363    | -                                               | 129 (11.2)                      | 138 (8.6)                       |
| Laboratory measurements at the time of hospitalisation                |                               |                               |          |                                                 |                                 |                                 |
| Inflammatory panel                                                    |                               |                               |          |                                                 |                                 |                                 |
| C-Reactive Protein (CRP) - mg/L                                       | 101.0 (41.6, 176.8)           | 44.9 (12.8, 114.8)            | <0.001   | -0.4 (-0.5, -0.3)                               | 733 (88.7)                      | 569 (72.8)                      |
| Lymphocytes - 10 <sup>9</sup> /L                                      | 0.9 (0.6, 1.4)                | 1.3 (0.8, 1.9)                | <0.001   | 0.1 (-0.0, 0.2)                                 | 758 (91.8)                      | 649 (83.0)                      |
| Basophils - 10 <sup>9</sup> /L                                        | 0.0 (0.0, 0.0)                | 0.0 (0.0, 0.0)                | <0.001   | 0.2 (0.1, 0.3)                                  | 758 (91.8)                      | 648 (82.9)                      |
| Eosinophils - 10 <sup>9</sup> /L                                      | 0.0 (0.0, 0.0)                | 0.1 (0.0, 0.1)                | <0.001   | 0.4 (0.3, 0.5)                                  | 758 (91.8)                      | 648 (82.9)                      |
| Neutrophils - 10 <sup>9</sup> /L                                      | 5.7 (4.0, 8.1)                | 6.9 (4.8, 10.4)               | <0.001   | 0.3 (0.2, 0.4)                                  | 758 (91.8)                      | 648 (82.9)                      |
| Monocytes - 10 <sup>9</sup> /L                                        | 0.5 (0.4, 0.7)                | 0.7 (0.5, 1.0)                | <0.001   | 0.4 (0.3, 0.5)                                  | 758 (91.8)                      | 648 (82.9)                      |
| White blood cells - 10 <sup>9</sup> /L                                | 7.3 (5.6, 10.0)               | 9.5 (7.1, 12.9)               | <0.001   | 0.4 (0.2, 0.5)                                  | 758 (91.8)                      | 648 (82.9)                      |
| Blood Count                                                           |                               |                               |          |                                                 |                                 |                                 |
| Haematocrit - L/L                                                     | 0.40 (0.37, 0.44)             | 0.39 (0.34, 0.43)             | <0.001   | -0.3 (-0.4, -0.1)                               | 758 (91.8)                      | 648 (82.9)                      |
| Haemoglobin - g/L                                                     | 134.0 (120.8, 147.0)          | 128.0 (113.0, 142.0)          | <0.001   | -0.3 (-0.4, -0.2)                               | 760 (92.0)                      | 650 (83.1)                      |
| Carboxyhaemoglobin - %                                                | 1.80 (1.25, 3.30)             | 3.50 (1.80, 4.90)             | <0.001   | 0.6 (0.4, 0.8)                                  | 303 (36.7)                      | 213 (27.2)                      |
| Deoxyhaemoglobin - %                                                  | 6.40 (2.50, 25.40)            | 13.30 (3.60, 34.95)           | 0.003    | 0.2 (0.1, 0.4)                                  | 301 (36.4)                      | 211 (27.0)                      |
| Methaemoglobin - %                                                    | 0.7 (0.5, 0.9)                | 0.7 (0.5, 1.0)                | 0.289    | 0.1 (-0.0, 0.3)                                 | 303 (36.7)                      | 213 (27.2)                      |
| Oxyhaemoglobin - %                                                    | 90.7 (70.8, 95.2)             | 81.2 (60.2, 92.7)             | <0.001   | -0.3 (-0.5, -0.1)                               | 303 (36.7)                      | 213 (27.2)                      |
| Mean corpuscular haemoglobin - pg                                     | 30.0 (28.4, 31.3)             | 30.0 (28.4, 31.5)             | 0.542    | 0.1 (-0.0, 0.2)                                 | 758 (91.8)                      | 648 (82.9)                      |
| Mean corpuscular haemoglobin concentration - g/L                      | 332 (325, 338)                | 329 (321, 337)                | <0.001   | -0.3 (-0.4, -0.2)                               | 758 (91.8)                      | 648 (82.9)                      |
| Mean corpuscular volume - fL                                          | 90.0 (85.0, 94.0)             | 91.0 (86.0, 95.5)             | 0.002    | 0.2 (0.1, 0.3)                                  | 758 (91.8)                      | 648 (82.9)                      |
| Mean platelet volume - fL                                             | 8.3 (7.7, 9.2)                | 8.3 (7.5, 9.0)                | 0.046    | -0.1 (-0.2, 0.0)                                | 757 (91.6)                      | 648 (82.9)                      |
| Red cell distribution width - %                                       | 13.8 (12.9, 15.0)             | 14.1 (13.0, 15.7)             | 0.001    | 0.2 (0.1, 0.3)                                  | 758 (91.8)                      | 648 (82.9)                      |
| Red blood cell count - 10 <sup>12</sup> /L                            | 4.50 (4.07, 4.95)             | 4.27 (3.83, 4.76)             | <0.001   | -0.3 (-0.4, -0.2)                               | 758 (91.8)                      | 648 (82.9)                      |
| Liver and Kidney Function tests                                       |                               |                               |          |                                                 |                                 |                                 |
| Alanine aminotransferase (ALT) - U/L                                  | 30.0 (18.0, 48.8)             | 22.0 (14.0, 40.0)             | <0.001   | -0.1 (-0.2, 0.0)                                | 734 (88.9)                      | 577 (73.8)                      |
| Total bilirubin - µmol/L                                              | 11.0 (8.0, 15.0)              | 10.0 (7.0, 15.0)              | 0.070    | 0.1 (-0.0, 0.2)                                 | 745 (90.2)                      | 590 (75.4)                      |
| Alkaline phosphatase (ALP) - IU/L                                     | 83 (64, 113)                  | 96 (73, 134)                  | <0.001   | 0.2 (0.1, 0.3)                                  | 747 (90.4)                      | 595 (76.1)                      |
| Albumin - g/L                                                         | 34.0 (30.0, 37.0)             | 35.0 (30.0, 39.8)             | <0.001   | 0.2 (0.1, 0.3)                                  | 746 (90.3)                      | 594 (76.0)                      |
| Total protein - IU/L                                                  | 66.0 (61.0, 71.0)             | 66.0 (61.0, 72.0)             | 0.268    | 0.1 (-0.0, 0.2)                                 | 584 (70.7)                      | 394 (50.4)                      |
| Coagulation panel                                                     |                               |                               |          |                                                 |                                 |                                 |
| Prothrombin time (PT) - seconds                                       | 14.3 (13.2, 16.0)             | 14.5 (13.3, 16.2)             | 0.271    | 0.1 (-0.0, 0.2)                                 | 550 (66.6)                      | 440 (56.3)                      |
| Activated partial thromboplastin time (APTT) - seconds                | 32.0 (29.2, 35.6)             | 30.5 (27.9, 34.4)             | <0.001   | -0.2 (-0.3, -0.0)                               | 551 (66.7)                      | 440 (56.3)                      |

|                                                  | COVID-19 positive<br>(n=1148) | COVID-19 negative<br>(n=1608) | P-value* | Standardised<br>mean<br>difference<br>(95% CI)† | COVID19<br>Positive<br>(n=1148) | COVID19<br>Negative<br>(n=1608) |
|--------------------------------------------------|-------------------------------|-------------------------------|----------|-------------------------------------------------|---------------------------------|---------------------------------|
| Fibrinogen - g/L                                 | 6.49 (5.30, 7.59)             | 5.38 (4.12, 6.87)             | <0.001   | -0.5 (-0.6, -0.3)                               | 544 (65.9)                      | 437 (55.9)                      |
| Platelet count - 10 <sup>9</sup> /L              | 220 (169, 288)                | 251 (193, 330)                | <0.001   | 0.3 (0.2, 0.4)                                  | 757 (91.6)                      | 648 (82.9)                      |
| D-dimer - µg/L                                   | 1530 (864, 2740)              | 1580 (797, 3398)              | 0.856    | 0.1 (-0.0, 0.3)                                 | 485 (58.7)                      | 202 (25.8)                      |
| Electrolytes                                     |                               |                               |          |                                                 |                                 |                                 |
| Bicarbonate - mmol/L                             | 23.1 (20.1, 25.9)             | 23.6 (20.8, 26.6)             | 0.153    | 0.1 (-0.1, 0.2)                                 | 307 (37.2)                      | 216 (27.6)                      |
| Calcium - mmol/L                                 | 2.13 (2.03, 2.24)             | 2.24 (2.12, 2.34)             | <0.001   | 0.5 (0.4, 0.7)                                  | 596 (72.2)                      | 403 (51.5)                      |
| Adjusted calcium - mmol/L                        | 2.26 (2.18, 2.34)             | 2.34 (2.27, 2.42)             | <0.001   | 0.5 (0.4, 0.6)                                  | 594 (71.9)                      | 402 (51.4)                      |
| Ionised calcium - mmol/L                         | 1.11 (1.06, 1.18)             | 1.13 (1.05, 1.21)             | 0.134    | 0.2 (-0.0, 0.3)                                 | 303 (36.7)                      | 214 (27.4)                      |
| Chloride - mmol/L                                | 100 (97, 104)                 | 102 (98, 104)                 | 0.006    | 0.0 (-0.1, 0.1)                                 | 758 (91.8)                      | 635 (81.2)                      |
| Magnesium - mmol/L                               | 0.84 (0.74, 0.91)             | 0.81 (0.71, 0.88)             | <0.001   | -0.3 (-0.4, -0.1)                               | 458 (55.4)                      | 285 (36.4)                      |
| Potassium - mmol/L                               | 4.00 (3.70, 4.40)             | 4.10 (3.80, 4.50)             | 0.002    | 0.1 (0.0, 0.3)                                  | 751 (90.9)                      | 624 (79.8)                      |
| Phosphate - mmol/L                               | 0.97 (0.81, 1.17)             | 1.04 (0.88, 1.26)             | <0.001   | 0.2 (0.1, 0.3)                                  | 594 (71.9)                      | 404 (51.7)                      |
| Sodium - mmol/L                                  | 136 (133, 139)                | 136 (133, 139)                | 0.029    | 0.0 (-0.1, 0.1)                                 | 757 (91.6)                      | 634 (81.1)                      |
| Cardiac function                                 |                               |                               |          |                                                 |                                 |                                 |
| Troponin T - ng/L                                | 16.0 (8.0, 40.5)              | 14.0 (6.0, 33.8)              | 0.065    | 0.1 (-0.0, 0.2)                                 | 559 (67.7)                      | 300 (38.4)                      |
| Lactate dehydrogenase (LDH) - IU/L               | 405 (280, 571)                | 267 (213, 372)                | <0.001   | -0.5 (-0.7, -0.4)                               | 489 (59.2)                      | 191 (24.4)                      |
| Creatine Kinase - IU/L                           | 145.5 (66.0, 357.0)           | 89.0 (50.0, 196.5)            | <0.001   | -0.2 (-0.3, 0.0)                                | 514 (62.2)                      | 231 (29.5)                      |
| Renal function                                   |                               |                               |          |                                                 |                                 |                                 |
| Blood Creatinine - µmol/Litre                    | 87.0 (68.0, 118.0)            | 76.0 (62.0, 111.0)            | <0.001   | -0.1 (-0.2, 0.0)                                | 755 (91.4)                      | 631 (80.7)                      |
| Blood gas analyses                               |                               |                               |          |                                                 |                                 |                                 |
| pH                                               | 7.44 (7.39, 7.48)             | 7.41 (7.35, 7.46)             | <0.001   | -0.4 (-0.5, -0.2)                               | 303 (36.7)                      | 214 (27.4)                      |
| Partial pressure of oxygen (PaO2) - kPa          | 7.70 (4.60, 10.50)            | 6.00 (4.00, 9.50)             | 0.003    | -0.1 (-0.3, 0.1)                                | 303 (36.7)                      | 213 (27.2)                      |
| Partial pressure of carbon dioxide (PaCO2) - kPa | 4.40 (4.00, 5.40)             | 4.90 (4.10, 5.80)             | 0.001    | 0.3 (0.2, 0.5)                                  | 303 (36.7)                      | 214 (27.4)                      |
| Peripheral oxygen saturation (SpO2) - %          | 95.0 (92.0, 98.0)             | 97.0 (95.0, 99.0)             | <0.001   | 0.4 (0.3, 0.5)                                  | 747 (90.4)                      | 635 (81.2)                      |
| SpO2/FiO2 ratio                                  | 4.05 (1.53, 4.52)             | 4.52 (3.81, 4.62)             | <0.001   | 0.5 (0.3, 0.7)                                  | 292 (35.4)                      | 205 (26.2)                      |
| PaO2/FiO2 ratio                                  | 0.22 (0.15, 0.36)             | 0.24 (0.17, 0.38)             | 0.132    | 0.1 (-0.0, 0.3)                                 | 303 (36.7)                      | 213 (27.2)                      |
| Other laboratory measurements                    |                               |                               |          |                                                 |                                 |                                 |
| Ferritin - ng/mL                                 | 542.0 (242.0, 1143.0)         | 220.5 (86.5, 520.5)           | <0.001   | -0.0 (-0.2, 0.1)                                | 558 (67.6)                      | 256 (32.7)                      |
| Lactate - mmol/L                                 | 1.40 (1.00, 2.00)             | 1.60 (1.10, 2.38)             | 0.002    | 0.2 (0.1, 0.4)                                  | 305 (36.9)                      | 218 (27.9)                      |
| Glucose - mmol/L                                 | 6.80 (5.70, 9.33)             | 6.60 (5.50, 8.30)             | 0.031    | -0.2 (-0.3, 0.0)                                | 388 (47.0)                      | 281 (35.9)                      |
| Clinical measurements                            |                               |                               |          |                                                 |                                 |                                 |
| Respiratory rate - breaths/min                   | 23.0 (19.0, 28.0)             | 20.0 (18.0, 24.0)             | <0.001   | -0.4 (-0.5, -0.3)                               | 748 (90.6)                      | 636 (81.3)                      |
| Heart rate - beats/min                           | 94.0 (81.0, 109.0)            | 91.5 (78.8, 107.0)            | 0.038    | -0.1 (-0.2, 0.0)                                | 747 (90.4)                      | 636 (81.3)                      |
| Systolic blood pressure - mm Hg                  | 132 (115, 146)                | 134 (117, 150)                | 0.036    | 0.1 (0.0, 0.2)                                  | 742 (89.8)                      | 633 (80.9)                      |
| Diastolic blood pressure - mm Hg                 | 77 (67, 86)                   | 77 (67, 86)                   | 0.818    | 0.0 (-0.1, 0.2)                                 | 742 (89.8)                      | 633 (80.9)                      |

|                                                   | COVID-19 positive<br>(n=1148) | COVID-19 negative<br>(n=1608) | P-value* | Standardised<br>mean<br>difference<br>(95% CI)† | COVID19<br>Positive<br>(n=1148) | COVID19<br>Negative<br>(n=1608) |
|---------------------------------------------------|-------------------------------|-------------------------------|----------|-------------------------------------------------|---------------------------------|---------------------------------|
| Mean arterial pressure - mm Hg                    | 95 (85, 106)                  | 96 (86, 107)                  | 0.476    | 0.1 (-0.0, 0.2)                                 | 740 (89.6)                      | 628 (80.3)                      |
| Total early warning score (EWS)                   | 5.0 (2.0, 7.0)                | 3.0 (1.0, 5.0)                | <0.001   | -0.5 (-0.6, -0.4)                               | 748 (90.6)                      | 632 (80.8)                      |
| Temperature - °C                                  | 37.2 (36.4, 37.8)             | 36.6 (36.1, 37.3)             | <0.001   | -0.4 (-0.5, -0.3)                               | 746 (90.3)                      | 634 (81.1)                      |
| Ventilator oxygen flow rate - L/min               | 3.0 (0.0, 15.0)               | 1.0 (0.0, 4.0)                | <0.001   | -0.4 (-0.5, -0.3)                               | 650 (78.7)                      | 471 (60.2)                      |
| Ventilator fraction of inspired oxygen (FIO2) - % | 21.0 (21.0, 60.0)             | 21.0 (21.0, 24.0)             | <0.001   | -0.4 (-0.6, -0.2)                               | 304 (36.8)                      | 217 (27.7)                      |

Supplementary table 1. Selected baseline characteristics for patients identified as positive or negative for COVID-19 at their most recent hospital admission

\* Chi-squared tests were used for comparison of binary/categorical variables, Student's T tests for normally distributed continuous variables, and Wilcoxon rank-sum tests for non-normally distributed continuous variables.

† Laboratory and clinical measurements were log-transformed to obtain normal distributions before the standardised mean differences were estimated.

‡ NHS data dictionary ethnicity groupings were combined to define ethnicity categories: Black (combined: "African", "Caribbean", "White and Black Caribbean", "White and Black African", "Any other Black background"), Asian (combined: "Chinese", "Indian", "Pakistani", "Bangladeshi", "White and Asian"), White ("Irish", "British", "Any other White background"), and Other/Unspecified (combined: "Not Known", "Not stated", "Any other ethnic group", "Any other mixed background").

§ As per classification in the British National Formulary (BNF) pharmaceutical reference book for medications available on the UK National Health Service (NHS).

Supplementary table 2. Age- and sex- adjusted associations between potential risk factors and admission to the hospital's AICU, administration of mechanical ventilation, in-hospital mortality, and D-dimer  $\geq 1,000$   $\mu\text{g/L}$ .

| Outcome                             | Variable                                      | Odds ratio (95% CI) | P-value |
|-------------------------------------|-----------------------------------------------|---------------------|---------|
| Admission to AICU                   | Ethnicity                                     |                     |         |
|                                     | White                                         | 1.000               | -       |
|                                     | Asian                                         | 1.177 (0.585-2.303) | 0.640   |
|                                     | Black                                         | 1.414 (0.612-3.095) | 0.399   |
|                                     | Other                                         | 1.100 (0.657-1.853) | 0.719   |
|                                     | Alanine aminotransferase - per 1 U/L          | 1.001 (0.999-1.002) | 0.433   |
|                                     | C reactive protein - per 1 mg/L               | 1.006 (1.004-1.008) | <0.001  |
|                                     | Haemoglobin - per 1 g/L                       | 1.017 (1.006-1.029) | 0.004   |
|                                     | Lymphocyte count - per $10^9/\text{L}$        | 0.912 (0.630-1.062) | 0.590   |
|                                     | Potassium - per 1 mmol/L                      | 0.847 (0.591-1.180) | 0.348   |
|                                     | Red blood cell count - per $10^{12}/\text{L}$ | 1.696 (1.249-2.322) | 0.001   |
|                                     | Sodium - per 1 mmol/L                         | 0.949 (0.911-0.987) | 0.010   |
|                                     | Troponin T - per 1 ng/L                       | 1.000 (0.999-1.000) | 0.828   |
|                                     | White blood cell count - per $10^9/\text{L}$  | 1.044 (1.009-1.080) | 0.012   |
|                                     | Diastolic blood pressure - per 1 mm Hg        | 1.011 (0.998-1.025) | 0.092   |
|                                     | Systolic blood pressure - per 1 mm Hg         | 1.009 (1.000-1.018) | 0.051   |
|                                     | Heart rate - per 1 beat/min                   | 1.010 (1.000-1.020) | 0.055   |
|                                     | Respiratory rate - per 1 breath/min           | 1.025 (1.001-1.049) | 0.037   |
| Temperature - per $1^\circ\text{C}$ | 1.303 (1.082-1.595)                           | 0.007               |         |
| Mechanical ventilation              | Ethnicity                                     |                     |         |
|                                     | White                                         | 1.000               | -       |
|                                     | Asian                                         | 0.508 (0.182-1.215) | 0.155   |
|                                     | Black                                         | 1.151 (0.434-2.727) | 0.761   |
|                                     | Other                                         | 0.843 (0.475-1.499) | 0.558   |
|                                     | Alanine aminotransferase - per 1 U/L          | 1.000 (0.996-1.002) | 0.924   |
|                                     | C reactive protein - per 1 mg/L               | 1.004 (1.001-1.006) | 0.002   |
|                                     | Haemoglobin - per 1 g/L                       | 1.006 (0.993-1.019) | 0.355   |
|                                     | Lymphocyte count - per $10^9/\text{L}$        | 1.059 (0.980-1.184) | 0.130   |
|                                     | Potassium - per 1 mmol/L                      | 0.753 (0.481-1.131) | 0.197   |
|                                     | Red blood cell count - per $10^{12}/\text{L}$ | 1.280 (0.893-1.842) | 0.181   |
|                                     | Sodium - per 1 mmol/L                         | 0.923 (0.879-0.966) | 0.001   |
|                                     | Troponin T - per 1 ng/L                       | 1.000 (0.999-1.000) | 0.814   |
|                                     | White blood cell count - per $10^9/\text{L}$  | 1.032 (0.989-1.072) | 0.114   |
|                                     | Diastolic blood pressure - per 1 mm Hg        | 0.989 (0.973-1.005) | 0.193   |
|                                     | Systolic blood pressure - per 1 mm Hg         | 1.000 (0.989-1.011) | 0.960   |
|                                     | Heart rate - per 1 beat/min                   | 1.004 (0.992-1.015) | 0.534   |
|                                     | Respiratory rate - per 1 breath/min           | 1.021 (0.994-1.048) | 0.113   |
| Temperature - per $1^\circ\text{C}$ | 1.192 (0.971-1.463)                           | 0.087               |         |
| In-hospital mortality               | Ethnicity                                     |                     |         |
|                                     | White                                         | 1.000               | -       |
|                                     | Asian                                         | 2.354 (1.232-4.503) | 0.009   |
|                                     | Black                                         | 2.205 (0.905-5.199) | 0.074   |
|                                     | Other                                         | 1.006 (0.593-1.712) | 0.981   |
|                                     | Alanine aminotransferase - per 1 U/L          | 1.002 (1.000-1.005) | 0.142   |
|                                     | C reactive protein - per 1 mg/L               | 1.003 (1.001-1.006) | 0.001   |
|                                     | Haemoglobin - per 1 g/L                       | 1.007 (0.997-1.017) | 0.185   |
|                                     | Lymphocyte count - per $10^9/\text{L}$        | 1.032 (0.956-1.173) | 0.456   |
|                                     | Potassium - per 1 mmol/L                      | 1.039 (0.760-1.403) | 0.808   |
|                                     | Red blood cell count - per $10^{12}/\text{L}$ | 1.294 (0.974-1.726) | 0.077   |
|                                     | Sodium - per 1 mmol/L                         | 1.036 (1.004-1.071) | 0.029   |
|                                     | Troponin T - per 1 ng/L                       | 1.000 (1.000-1.001) | 0.195   |
|                                     | White blood cell count - per $10^9/\text{L}$  | 1.013 (0.977-1.049) | 0.474   |
|                                     | Diastolic blood pressure - per 1 mm Hg        | 1.009 (0.997-1.021) | 0.137   |
|                                     | Systolic blood pressure - per 1 mm Hg         | 1.005 (0.996-1.013) | 0.284   |

|                    |                                                 |                     |        |
|--------------------|-------------------------------------------------|---------------------|--------|
|                    | Heart rate - per 1 beat/min                     | 1.007 (0.998-1.017) | 0.127  |
|                    | Respiratory rate - per 1 breath/min             | 1.061 (1.035-1.090) | <0.001 |
|                    | Temperature - per 1 °C                          | 0.890 (0.731-1.084) | 0.246  |
| D-dimer ≥1000 µg/L | Ethnicity                                       |                     |        |
|                    | White                                           | 1.000               | -      |
|                    | Asian                                           | 2.123 (0.969-5.074) | 0.072  |
|                    | Black                                           | 1.830 (0.730-5.276) | 0.224  |
|                    | Other                                           | 1.811 (1.032-3.209) | 0.040  |
|                    | Alanine aminotransferase - per 1 U/L            | 1.011 (1.004-1.019) | 0.005  |
|                    | C reactive protein - per 1 mg/L                 | 1.007 (1.005-1.010) | <0.001 |
|                    | Haemoglobin - per 1 g/L                         | 0.982 (0.970-0.993) | 0.002  |
|                    | Lymphocyte count - per 10 <sup>9</sup> /L       | 0.985 (0.911-1.111) | 0.690  |
|                    | Potassium - per 1 mmol/L                        | 1.615 (1.091-2.464) | 0.021  |
|                    | Red blood cell count - per 10 <sup>12</sup> /L  | 0.791 (0.573-1.086) | 0.149  |
|                    | Sodium - per 1 mmol/L                           | 0.967 (0.933-1.004) | 0.073  |
|                    | Troponin T - per 1 ng/L                         | 1.001 (1.000-1.005) | 0.307  |
|                    | White blood cell count - per 10 <sup>9</sup> /L | 1.093 (1.035-1.162) | 0.003  |
|                    | Diastolic blood pressure - per 1 mm Hg          | 1.005 (0.992-1.019) | 0.463  |
|                    | Systolic blood pressure - per 1 mm Hg           | 1.003 (0.993-1.013) | 0.574  |
|                    | Heart rate - per 1 beat/min                     | 1.010 (0.999-1.022) | 0.090  |
|                    | Respiratory rate - per 1 breath/min             | 1.018 (0.993-1.046) | 0.189  |
|                    | Temperature - per 1 °C                          | 0.805 (0.645-1.000) | 0.052  |

Supplementary table 3. 2x2 contingency tables used for Fisher's exact tests for computation of odds ratio associations of D-dimer <1000 µg/L and ≥1000 µg/L with admission to AICU, mechanical ventilation, and in-hospital mortality.

#### A Admission to AICU

|                    | Admitted to AICU | Not admitted to AICU |         |
|--------------------|------------------|----------------------|---------|
| D-dimer ≥1000 µg/L | 95               | 273                  | 368     |
| D-dimer <1000 µg/L | 22               | 573                  | 595     |
|                    | 117              | 846                  | N = 963 |

#### B Mechanical ventilation

|                    | Had mechanical ventilation | Did not have mechanical ventilation |         |
|--------------------|----------------------------|-------------------------------------|---------|
| D-dimer ≥1000 µg/L | 62                         | 306                                 | 368     |
| D-dimer <1000 µg/L | 14                         | 581                                 | 595     |
|                    | 76                         | 887                                 | N = 963 |

#### C Mortality

|                    | Died | Did not die |         |
|--------------------|------|-------------|---------|
| D-dimer ≥1000 µg/L | 77   | 291         | 368     |
| D-dimer <1000 µg/L | 98   | 497         | 595     |
|                    | 175  | 788         | N = 963 |



**a**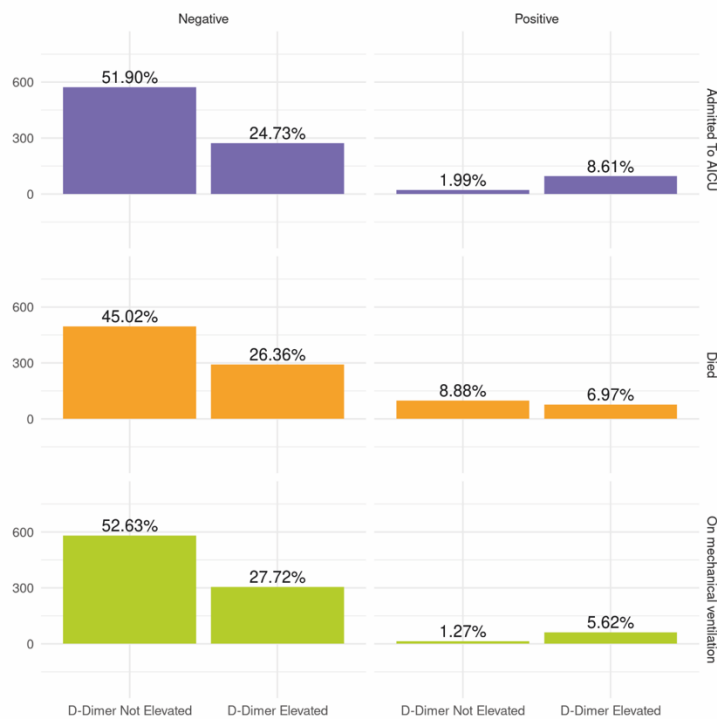**b**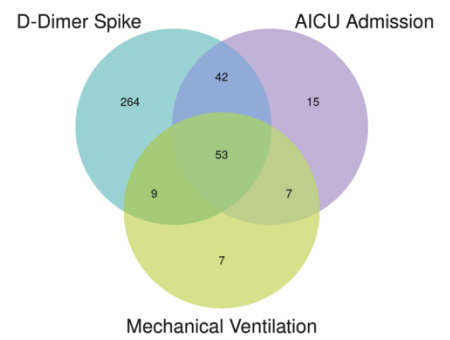**c**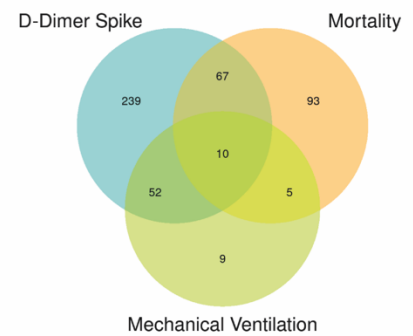

Supplementary Figure 1. Association of D-dimer ( $<1,000 \mu\text{g/L}$  and  $\geq 1,000 \mu\text{g/L}$ ), as a risk factor, with admission to the hospital's AICU, administration of mechanical ventilation and in-hospital mortality. a) Contingency plots representing associations of D-dimer  $<1000 \mu\text{g/L}$  (not elevated) and  $\geq 1000 \mu\text{g/L}$  (elevated) with admission to AICU, mechanical ventilation, and in-hospital mortality using Fisher's exact test (unadjusted for potential confounders); The percentages in the bar plot represent the fraction of patients with at least one D-dimer measurement. b) Venn Diagram representing the number of patients within D-dimer spikes, AICU admission and mechanical ventilation cohorts. c) Venn Diagram representing the number of patients within D-dimer spikes, mortality and mechanical ventilation cohorts.
